# Supplementary material for: Carbon dots with tunable dual emissions: from the mechanism to the specific imaging of endoplasmic reticulum polarity
Source: Royal Society of Chemistry journal article supplement (doi:10.1039/c9nr10982j), 2020-01-01
Supplement: c9nr10982j1.pdf [file c9nr10982j1.pdf]

## Supporting Information

# Carbon dots with tunable dual-emission: from the mechanism to specific imaging of endoplasmic reticulum polarity

*Shuang E<sup>a</sup>, Quanxing Mao<sup>b</sup>, Jianhua Wang<sup>a</sup>, Xuwei Chen<sup>\*a</sup>*

<sup>a</sup>Department of Chemistry, College of Sciences, Northeastern University, Shenyang, China,  
110819

<sup>b</sup>College of Chemistry, Liaoning University, Shenyang 110036, China

### **Corresponding author:**

\*E-mail: [chenxuwei@mail.neu.edu.cn](mailto:chenxuwei@mail.neu.edu.cn).

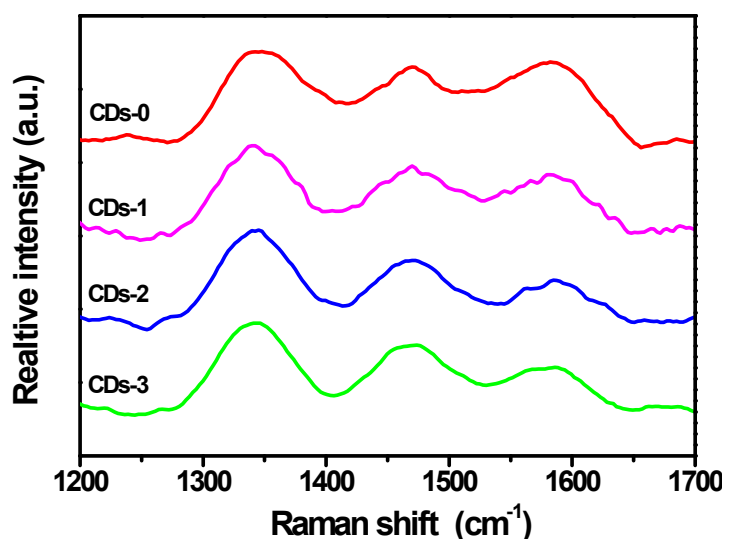

Fig. S1. Raman spectra of the four CDs products.

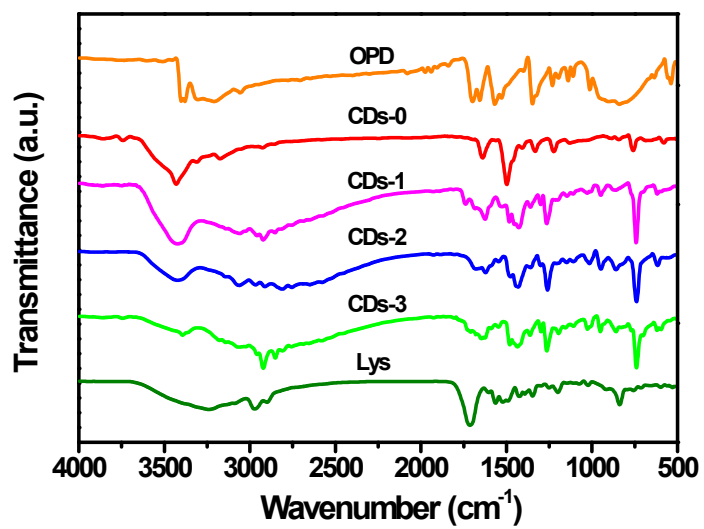

Fig. S2. FT-IR spectra of the four CDs products and precursors.

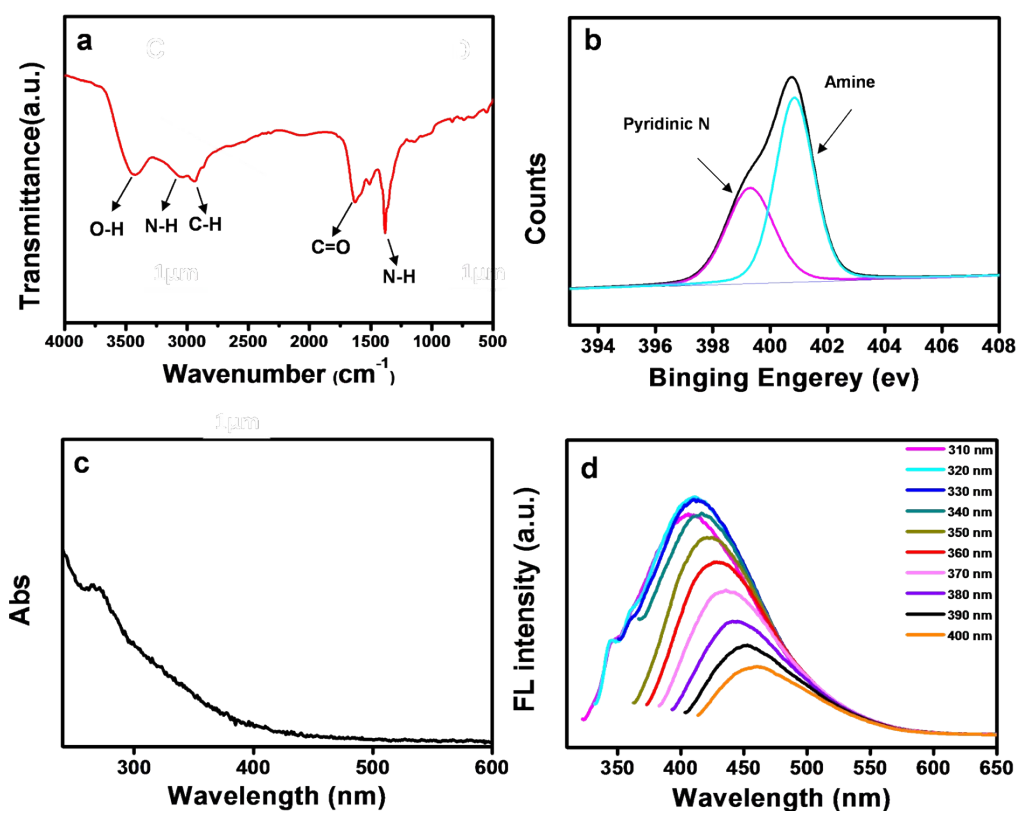

Fig. S3. FT-IR (a), XPS (b), UV spectra (c) and FL spectra (d) of LCDs.

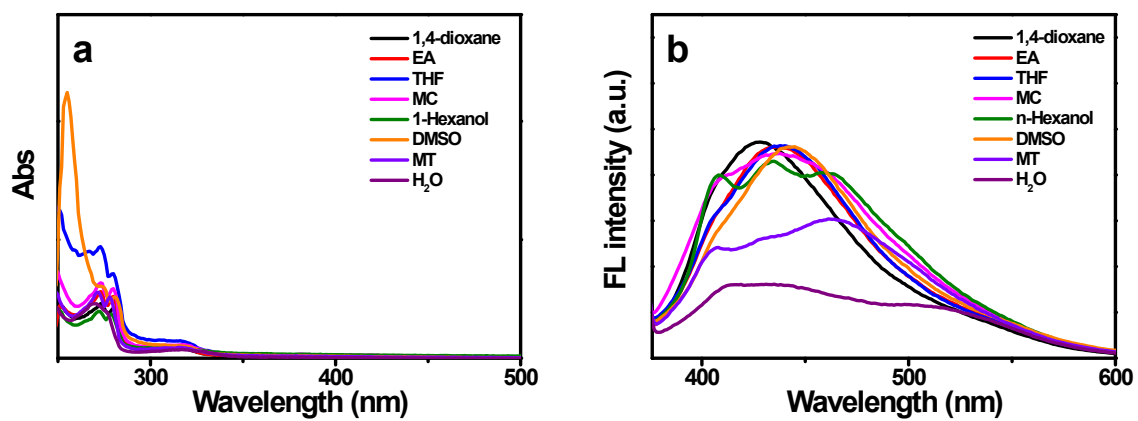

**Fig. S4.** The UV spectra of CDs-3 in different solvents (a). The fluorescence spectra of CDs-3 in different solvents (b). Ex=360 nm.

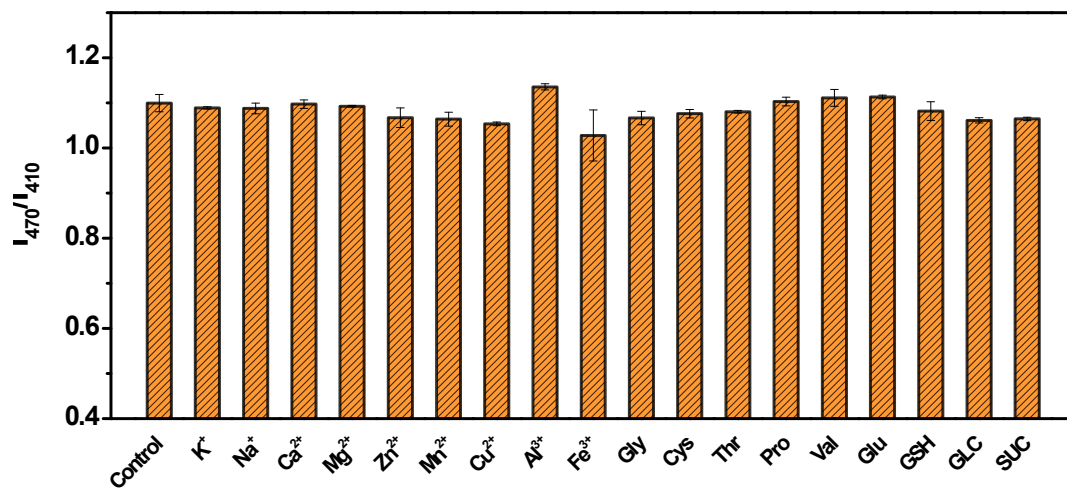

**Fig. S5.** Fluorescence ratio of  $I_{470}/I_{410}$  of CDs-3 in the presence of different interferences (0.01 mM for  $Al^{3+}$ ,  $Cu^{2+}$  and  $Fe^{3+}$ , 0.05 mM for  $K^+$ ,  $Na^+$ ,  $Ca^{2+}$ ,  $Mg^{2+}$ ,  $Zn^{2+}$  and  $Mn^{2+}$ , 0.10 mM for Gly, Cys, Thr, Pro, Val, Glu, GSH, GLC and SUC).

Ex=360 nm. Volume fraction of water/1,4-dioxane =50%/50%.

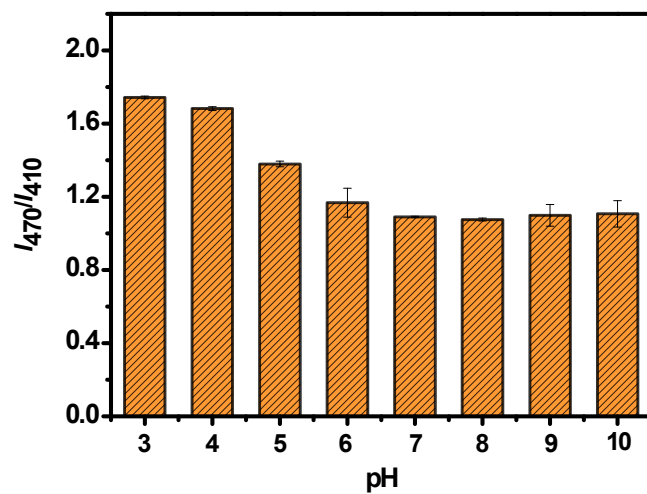

**Fig. S6.** Fluorescence ratio of  $I_{470}/I_{410}$  of CDs-3 at different pH values.

Ex=360 nm. Volume fraction of water/1,4-dioxane =50%/50%.

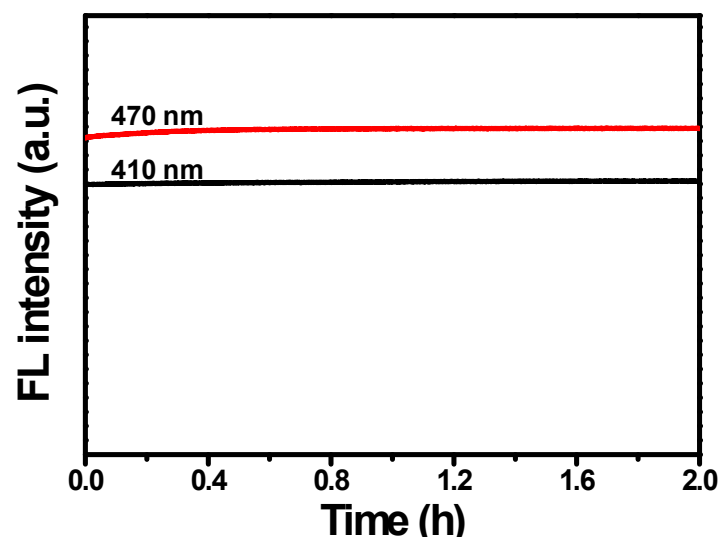

**Fig. S7.** Fluorescence intensity of CDs-3 under continuous irradiation of xenon lamp for 2 h.

Ex=360 nm. Volume fraction of water/1,4-dioxane =50%/50%.



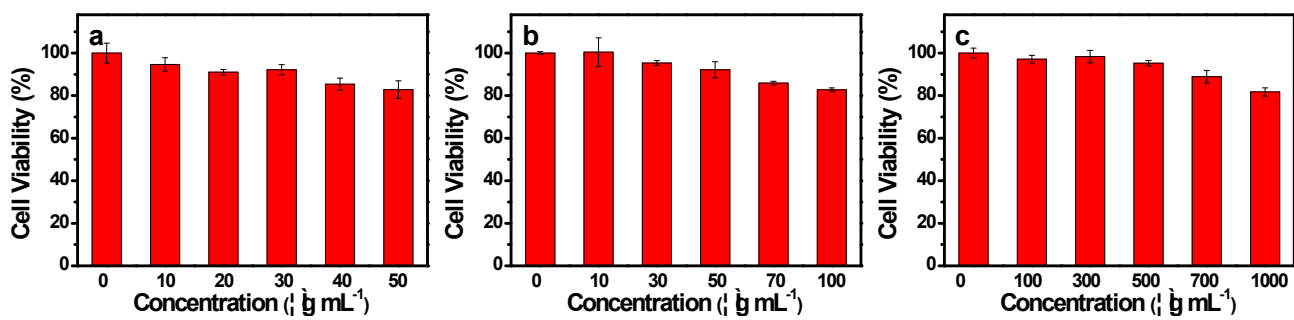

**Fig. S8.** Cytotoxicity of CDs-0 (a), CDs-3 (b) and LCDs (c).

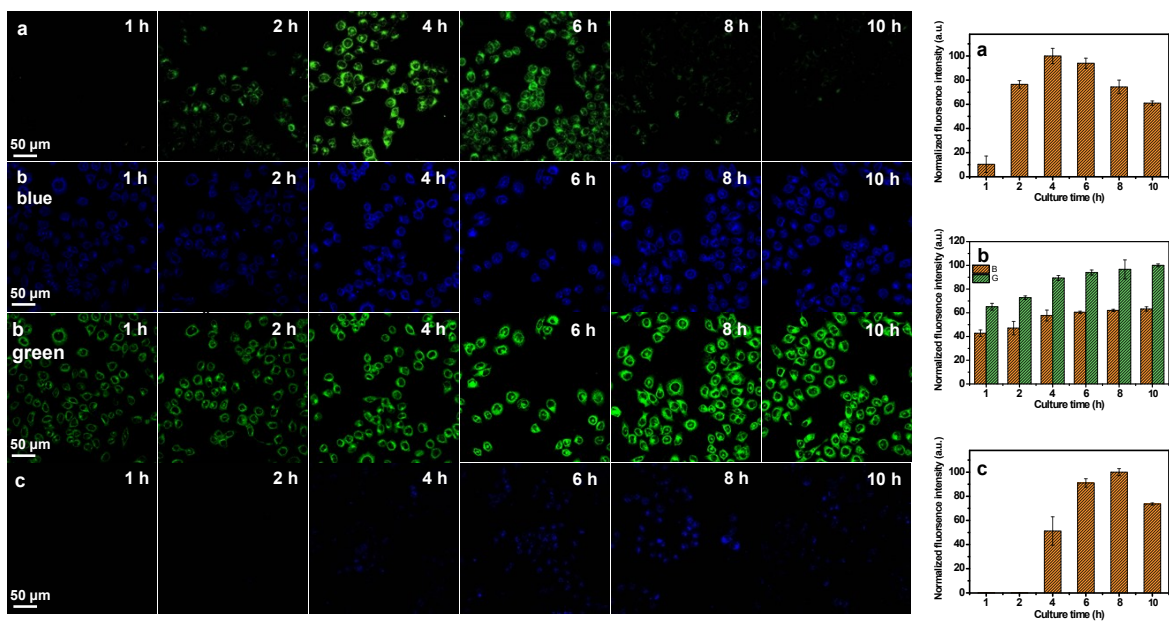

**Fig. S9.** CLSM images of MCF-7 cells incubated with 40 µg mL<sup>-1</sup> CDs-0 (a), 40 µg mL<sup>-1</sup> CDs-3 (b) and 500 µg mL<sup>-1</sup> LCDs (c) at different culture time.

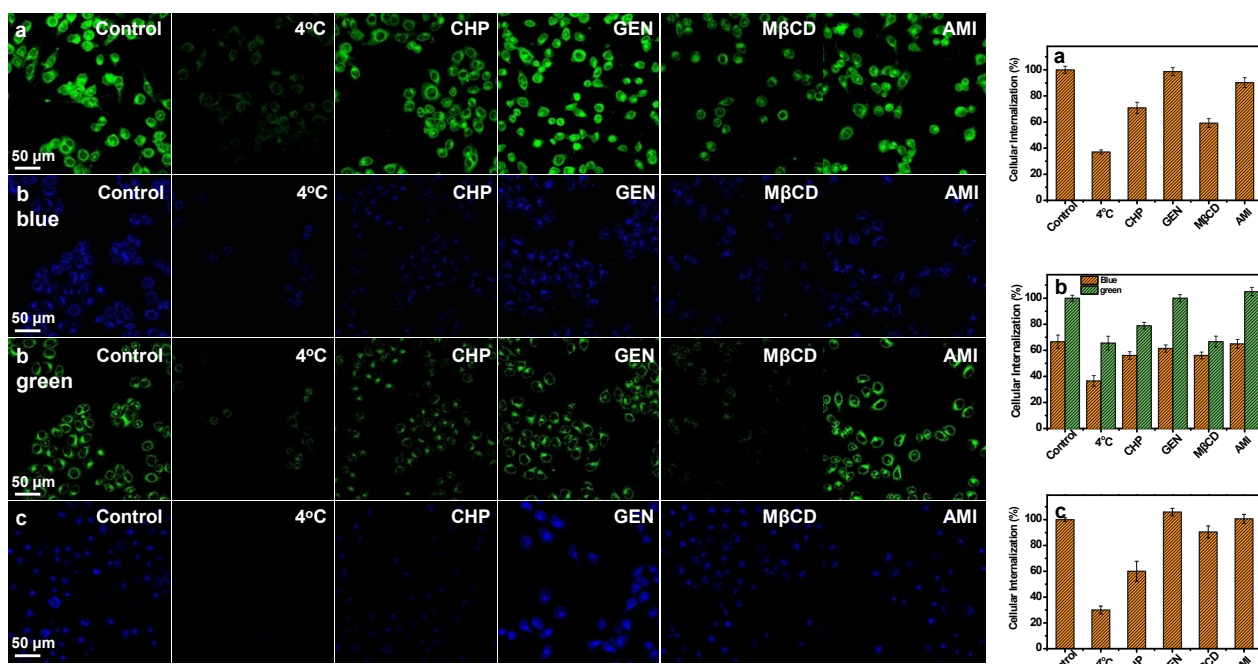

**Fig. S10.** CLSM images and cell internalization percentages of CDs-0 (a), CDs-3 (b) and LCDs (c) in the presence of different endocytosis inhibitors.

**Table S1.** XPS data analyses of C 1s spectra

| Product | C=C/C-C | C-N/C-O | C=O   | COOH  |
|---------|---------|---------|-------|-------|
| CDs-0   | 72.96%  | 21.67%  | 2.16% | 3.21% |
| CDs-1   | 68.00%  | 27.14%  | 2.01% | 2.85% |
| CDs-2   | 61.87%  | 28.31%  | 2.86% | 6.95% |
| CDs-3   | 60.89%  | 34.92%  | 4.19% | 0     |

**Table S2.** XPS data analyses of the N 1s spectra

| Product | Pyridinic N | Amine  | Pyrrolic N | Graphitic N |
|---------|-------------|--------|------------|-------------|
| CDs-0   | 43.47%      | 13.04% | 35.11%     | 8.38%       |
| CDs-1   | 30.09%      | 16.56% | 48.20%     | 5.25%       |
| CDs-2   | 5.56%       | 88.88% | 5.56%      | 0           |
| CDs-3   | 30.42%      | 34.49% | 35.09%     | 0           |

**Table S3.** Physical parameters of different solvents

| Solvent            | Dielectric constant<br>( $\epsilon$ ) <sup>a</sup> | Refractive index<br>( $n$ ) | Orientation polarizability<br>( $\Delta f$ ) <sup>b</sup> |
|--------------------|----------------------------------------------------|-----------------------------|-----------------------------------------------------------|
| 1, 4-dioxane       | 2.21                                               | 1.42                        | 0.021                                                     |
| Ethyl acetate      | 6.02                                               | 1.372                       | 0.199                                                     |
| Tetrahydrofuran    | 7.50                                               | 1.407                       | 0.209                                                     |
| Dichloromethane    | 10.42                                              | 1.444                       | 0.221                                                     |
| 1-Hexanol          | 13.03                                              | 1.418                       | 0.243                                                     |
| Dimethyl sulfoxide | 47.2                                               | 1.474                       | 0.265                                                     |
| Methanol           | 33.6                                               | 1.326                       | 0.310                                                     |
| Water              | 78.36                                              | 1.34                        | 0.321                                                     |

<sup>a</sup>Dielectric constant at 25 °C

$$\Delta f = \frac{\epsilon - 1}{2\epsilon + 1} - \frac{n^2 - 1}{2n^2 + 1}$$

**Table S4.** Physical parameters of binary mixed solvents

| Sample | Dioxane<br>Percent<br>(Volume<br>Fraction | H <sub>2</sub> O<br>Percent<br>(volume<br>Fraction | $\epsilon_{mix}^a$ | $n_{mix}^2{}^b$ | $\Delta f^c$ |
|--------|-------------------------------------------|----------------------------------------------------|--------------------|-----------------|--------------|
| 1      | 90%                                       | 10%                                                | 9.825              | 1.994           | 0.228        |
| 2      | 80%                                       | 20%                                                | 17.444             | 1.972           | 0.262        |
| 3      | 70%                                       | 30%                                                | 25.055             | 1.950           | 0.277        |
| 4      | 60%                                       | 40%                                                | 32.670             | 1.928           | 0.286        |
| 5      | 50%                                       | 50%                                                | 40.285             | 1.906           | 0.293        |
| 6      | 40%                                       | 60%                                                | 47.900             | 1.884           | 0.299        |
| 7      | 30%                                       | 70%                                                | 55.515             | 1.862           | 0.304        |
| 8      | 20%                                       | 80%                                                | 63.130             | 1.839           | 0.309        |
| 9      | 10%                                       | 90%                                                | 70.745             | 1.818           | 0.313        |

$${}^a\epsilon_{mix} = f_a\epsilon_a + f_b\epsilon_b$$

$${}^b n_{mix}^2 = f_a n_a^2 + f_b n_b^2$$

$${}^c \Delta f = \frac{\epsilon_{mix} - 1}{2\epsilon_{mix} + 1} - \frac{n_{mix}^2 - 1}{2n_{mix}^2 + 1}$$

**Table S5.** The correlation coefficient of CDs-0, CDs-3 and LCDs with different organelle probe

| Sample<br>Probe   | CDs-0            |                  | CDs-3 |      | LCDs |      |
|-------------------|------------------|------------------|-------|------|------|------|
|                   | PCC <sup>a</sup> | OLC <sup>b</sup> | PCC   | OLC  | PCC  | OLC  |
| Lyso-Tracker Red  | 0.52             | 0.56             | 0.33  | 0.39 | 0.84 | 0.86 |
| MitoRed           | 0.34             | 0.39             | 0.53  | 0.63 | 0.36 | 0.41 |
| ER-Tracker Red    | 0.57             | 0.61             | 0.85  | 0.91 | 0.57 | 0.62 |
| Golgi-Tracker Red | 0.55             | 0.58             | 0.29  | 0.39 | 0.29 | 0.32 |

<sup>a</sup>PCC: Pearson's correlation coefficient

<sup>b</sup>OLC: Overlap coefficient
